# Supplementary material for: The NLRP3 rs10754558 Polymorphism Is Associated with the Occurrence and Prognosis of Coronary Artery Disease in the Chinese Han Population
Source: PubMed Central journal article supplement (PMC4823501; doi:10.1155/2016/3185397), 2016-03-24
Supplement: 3185397.f1.pdf [file 3185397.f1.pdf]

## DNA Isolation and Genotyping

White blood cells and serum were separated and stored at  $-80^{\circ}\text{C}$ . Genomic DNA was extracted from the white blood cells using the commercially available DNA isolation kit (Tiangen Biotech, Beijing, China) according to the manufacturer's protocol. Genotyping was performed for each individual DNA sample using the ABI PRISM-Snapshot method (Applied Biosystem, USA). In brief, the Snapshot reactions were performed in a 10  $\mu\text{l}$  final volume containing primer mix (0.02-0.5  $\mu\text{mol/l}$ ), 5  $\mu\text{l}$  Snapshot Multiplex Ready Mix, and 4  $\mu\text{l}$  template consisting of the multiplex PCR products. The multiplex PCR products were purified with the Fermentas PCR Purification Kit (Fermentas, CA) following a cycling program consisted of 25 cycles of  $96^{\circ}\text{C}$  for 10s,  $51^{\circ}\text{C}$  for 5s, and  $60^{\circ}\text{C}$  for 30 s. The extension products were purified by a 15-min incubation with shrimp alkaline phosphatase (1 U, Fermentas, CA) at  $37^{\circ}\text{C}$  and a subsequent 15-min incubation at  $75^{\circ}\text{C}$  to denature the enzyme. After mixture of the purified products (0.5  $\mu\text{l}$ ), Hidi-Formamide (8.5  $\mu\text{l}$ ) and GeneScan<sup>TM</sup>-120 LIZ Size Standard (Applied Biosystems, 0.5  $\mu\text{l}$ ), the final reaction mix was denatured at  $95^{\circ}\text{C}$  for 5 min. The genotypes of the *NLRP3* *rs10754558* and *CARD8* *rs204321* were identified by capillary electrophoresis (ABI PRISM3730 DNA Sequencer; Applied Biosystems). The results were analyzed with Gene Mapper 3.0 software (Applied Biosystems). All the SNaPShot and PCR primers are listed in Supplementary Table 1. Finally, to ascertain the multiplex Snapshot results, 40 samples were selected at random and re-genotyped by direct sequencing using a BigDye terminator (Applied Biosystem). All assays were 100% concordant.

Supplementary Table 1. Snapshot and PCR primers of the gene polymorphisms of the NLRP3 rs10754558 and CARD8 rs2043211

| Gene  | polymorphism | Forward primer         | Reverse primer          | SNaPshot primer                          |
|-------|--------------|------------------------|-------------------------|------------------------------------------|
| CARD8 | rs20432111   | ATTGAGACACAGCGTCCAATAG | ATGCTATCATCAGGCACCTACC  | ttttttttttttttttttttttACTCAGGAACAGCACGGA |
| NLRP3 | rs10754558   | CCTGAGCTGACCGTCGTCTT   | ATGAGGTCACCAAGAGGAACATC | ttttttttttttttttttttttACAGCATCGGGTGTGTGT |
